# Supplementary material for: Ultrafast formation of ANFs with kinetic advantage and new insight into the mechanism
Source: Royal Society of Chemistry journal article supplement (doi:10.1039/d1na00897h), 2022-01-01
Supplement: d1na00897h1.pdf [file d1na00897h1.pdf]

## Ultrafast formation of ANFs with kinetic advantage and new insight in mechanism

Lianqing Huang<sup>a</sup>, Meiyun Zhang<sup>a,\*</sup>, Jingyi Nie<sup>a,\*</sup>, Bin Yang<sup>a,\*</sup>, Jiaojun Tan<sup>a</sup>, Shunxi Song<sup>a</sup>

<sup>a</sup> College of Bioresources Chemical and Materials Engineering, Shaanxi Province Key Laboratory of Papermaking Technology and Specialty Paper, National Demonstration Center for Experimental Light Chemistry Engineering Education, Key Laboratory of Paper-Based Functional Materials of China National Light Industry, Shaanxi University of Science & Technology, Xi'an 710021, China

\* Corresponding author.

E-mail addresses: niejingyi@sust.edu.cn (J. Nie), mymyzhang@sust.edu.cn (M. Zhang).

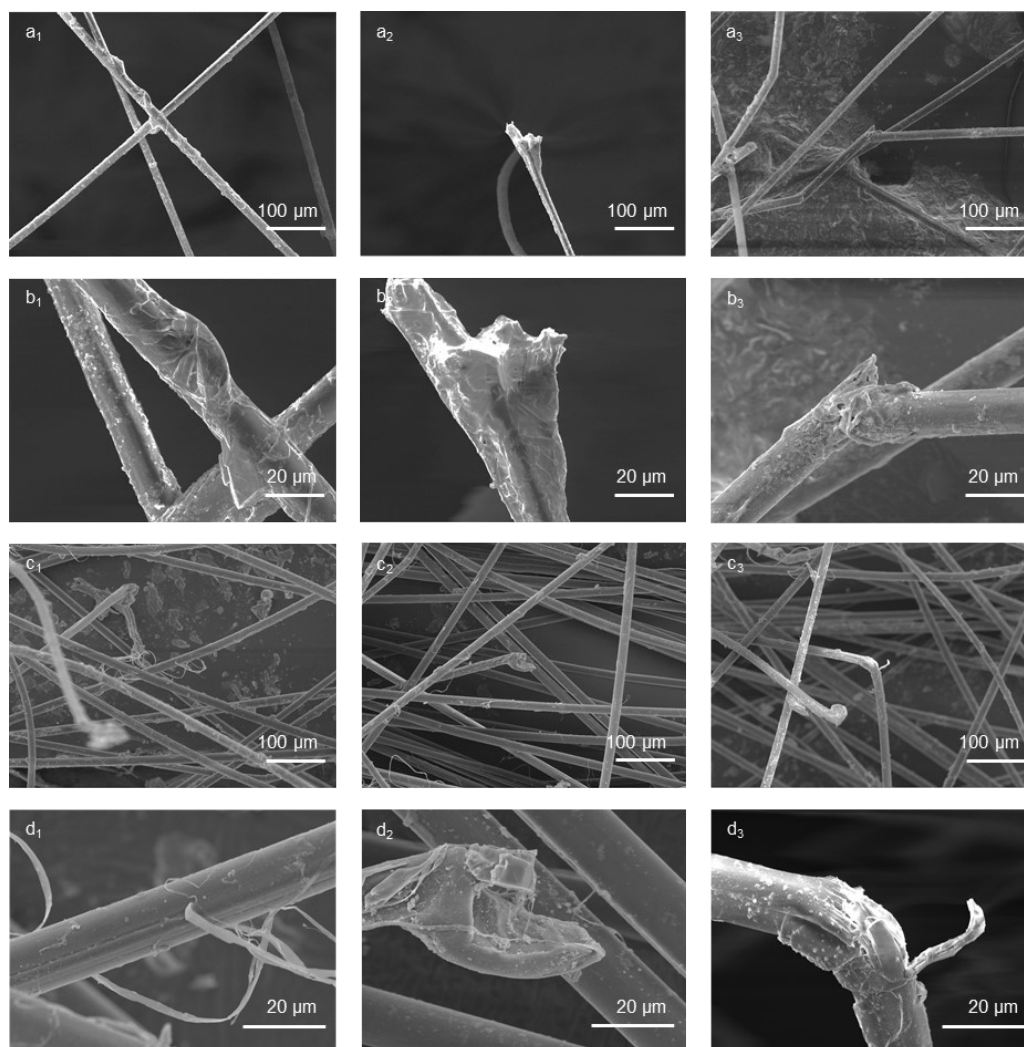

**Figure S1. Microstructure of fiber pretreated by alkali solution.** (a) Unwashed fibers and (c) washed fibers which were pretreated with alkaline solution. (b) and (d) were zoom images, respectively.

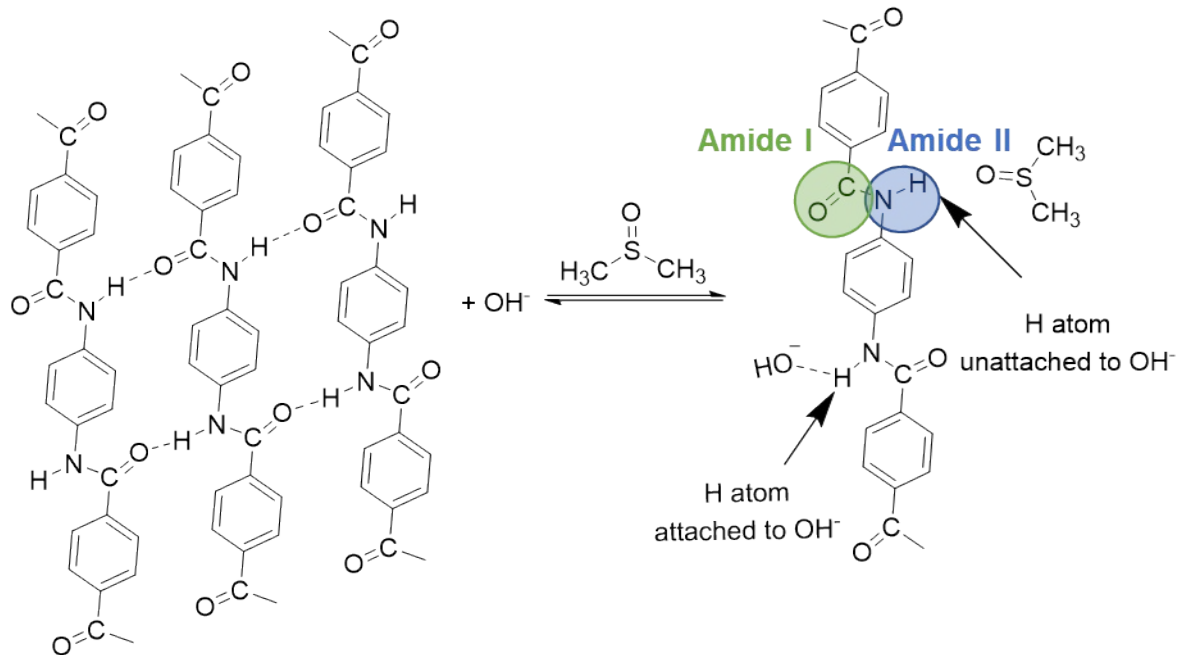

**Figure S2. Hypothesis of the formation of ANFs.**

**Table S1.** Different mass ratios of KOH to aramid fibers

| <b>Volume of H<sub>2</sub>O (ml)</b> | <b>Mass of KOH (g)</b> | <b>Mass of KOH: Aramid fibers (g:g)</b> | <b>Concentration of KOH in H<sub>2</sub>O (g·ml<sup>-1</sup>)</b> | <b>Volume of DMSO (ml)</b> | <b>Concentration of ANFs (wt %)</b> |
|--------------------------------------|------------------------|-----------------------------------------|-------------------------------------------------------------------|----------------------------|-------------------------------------|
| 2                                    | 0.05                   | 1:2                                     | 0.025                                                             | 50                         | 0.2                                 |
| 2                                    | 0.1                    | 2:2                                     | 0.05                                                              | 50                         | 0.2                                 |
| 2                                    | 0.15                   | 3:2                                     | 0.075                                                             | 50                         | 0.2                                 |
| 2                                    | 0.2                    | 4:2                                     | 0.1                                                               | 50                         | 0.2                                 |
| 2                                    | 0.25                   | 5:2                                     | 0.125                                                             | 50                         | 0.2                                 |

**Table S2.** Different volume ratios of H<sub>2</sub>O to DMSO

| <b>Volume of H<sub>2</sub>O (ml)</b> | <b>Volume percentage</b> | <b>Mass of KOH (g)</b> | <b>Concentration of KOH in H<sub>2</sub>O (g ml<sup>-1</sup>)</b> | <b>Volume of DMSO (ml)</b> | <b>Concentration of ANFs (wt %)</b> |
|--------------------------------------|--------------------------|------------------------|-------------------------------------------------------------------|----------------------------|-------------------------------------|
| 0.5                                  | 1%                       | 0.15                   | 0.3                                                               | 50                         | 0.2                                 |
| 1                                    | 2%                       | 0.15                   | 0.15                                                              | 50                         | 0.2                                 |
| 1.5                                  | 3%                       | 0.15                   | 0.1                                                               | 50                         | 0.2                                 |
| 2                                    | 4%                       | 0.15                   | 0.075                                                             | 50                         | 0.2                                 |
| 2.5                                  | 5%                       | 0.15                   | 0.06                                                              | 50                         | 0.2                                 |

**Table S3.** Summary of ANFs preparation methods

| Preparation Method                   | Concentration | Diameter of ANFs              | Energy Consumption | Operability | Preparation time | Ref.      |
|--------------------------------------|---------------|-------------------------------|--------------------|-------------|------------------|-----------|
| Polymerization induced self-assembly | 3 wt%         | 20-50 nm                      | Low                | Low         |                  | 1         |
| Electrospinning                      | -             | 275 nm-15 $\mu$ m             | High               | Low         | -                | 2         |
| Immersion Rotary Jet-Spinning        | -             | 500-1000 nm                   | Medium             | Low         | -                | 3         |
| Mechanical Disintegration            | 1 wt%         | 10-200 nm                     | High               | Low         | -                | 4         |
| Deprotonation                        | 0.2 wt%       | 3-30 nm                       | Low                | High        | 7 days           | 5         |
| Proton donor-assisted                | 0.2 wt%       | 10-12 nm                      | Low                | High        | 4 h              | 6         |
| monomer-to-ANFs synthesis            | 0.2 wt%       | 122 nm (DLS-determine d size) | Low                | High        | 15 h             | 7         |
| Sol-Group                            | 0.2 wt%       | 10-20 nm                      | Low                | High        | 20 min           | This work |
| Pre-Group                            | 0.2 wt%       | 10-20 nm                      | Low                | High        | 10 min           | This work |

**Table S4.** Wavenumbers and vibration types of aramid fibers and ANFs in Raman scattering.

| <b>Aramid fiber</b> | <b>ANFs/DMSO</b> | <b>Assignment/%</b>                             | <b>Shift</b> |
|---------------------|------------------|-------------------------------------------------|--------------|
|                     | 950, 1047, 1423  | DMSO                                            | Appear       |
| 1183                | 1159             | Ring C-H in-plane bending                       | shift        |
| 1276                | 1263             | N-H in-plane bending, ring C-H stretching       | shift        |
| 1324                | 1356             | Ring C-H in-plane bending, N-H in-plane bending | shift        |
| 1400                | 1431             | Ring C-H in-plane bending, ring C-C stretching  | shift        |
| 1509                | 1535             | ring C-H in-plane bending, ring C-C stretching  | shift        |
| 1611                | 1606             | ring C-C stretching, C=O stretching             | shift        |
| 1650                |                  | C=O stretching B, N-C stretching                | Disappear    |

**Table S5.** Wavenumbers and vibration types of aramid fibers and ANFs in FT-IR scattering.

| Aramid fiber | ANFs/DMSO | Assignment                                             | Shift     |
|--------------|-----------|--------------------------------------------------------|-----------|
|              | 1020      | DMSO                                                   | Appear    |
|              | 1423      | DMSO                                                   | Appear    |
| 819          | 831       | C-H aromatic ring                                      | Shift     |
| 864          | 900       | Ring C-H out-of-plane bending                          | Shift     |
| 964          | 950       | Ring C-H and N-H in-plane bending                      | Shift     |
| 1103         | 1065      | Ring C-H and N-H in-plane bending                      | Shift     |
| 1299         | 1309      | Ring C-C, C-N and N-H vibration                        | Shift     |
| 1395         | 1413      | Ring C-H, N-H and C-H in-plane bending, ring vibration | Shift     |
| 1608         | 1653      | C-C, N-C and C-H in-plane bending                      | Shift     |
| 1670         | 1653      | Amide I                                                | Shift     |
| 1538         |           | Amide II                                               | Disappear |

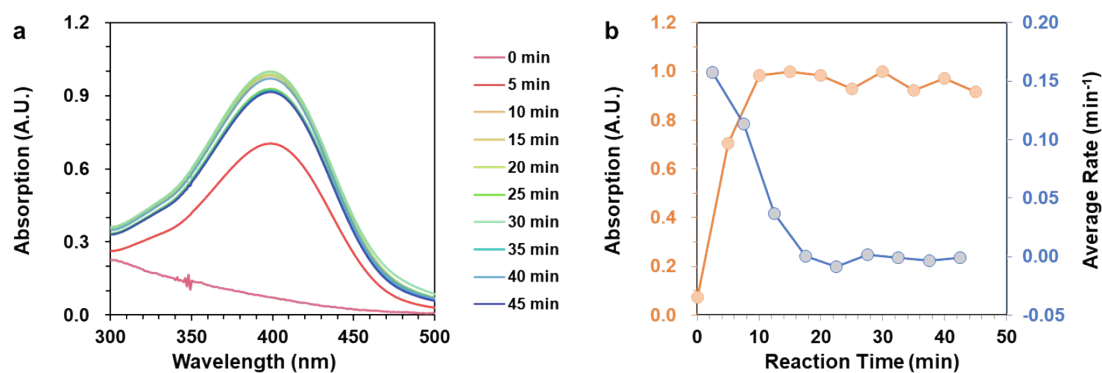

**Figure S3.** UV-Vis absorption and reaction rate of ANFs with different time when mass ratios of KOH to aramid fibers was 1:2.

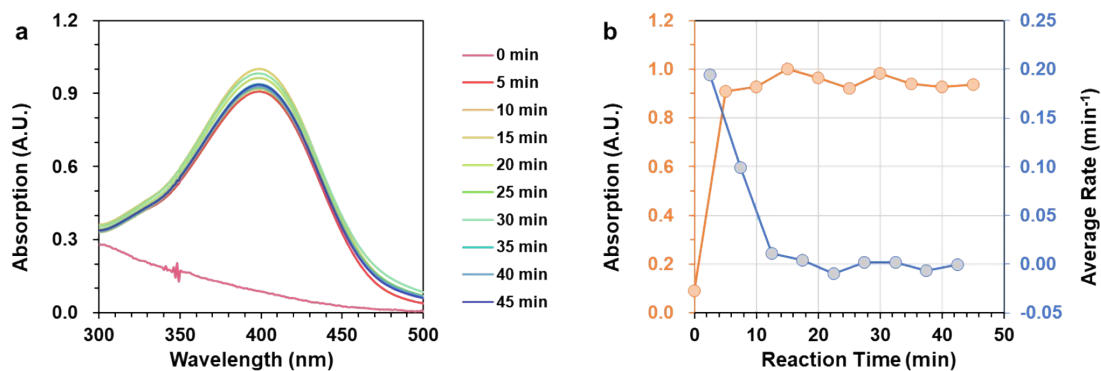

**Figure S4.** UV-Vis absorption and reaction rate of ANFs with different time when mass ratios of KOH to aramid fibers was 2:2.

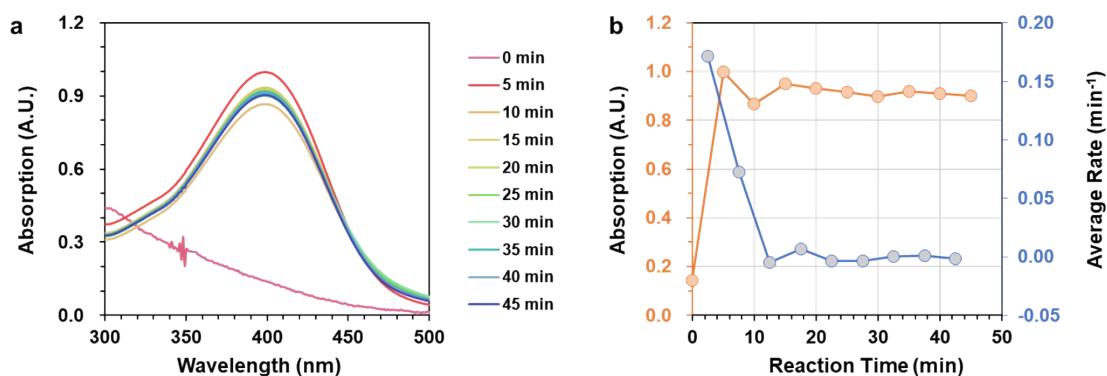

**Figure S5.** UV-Vis absorption and reaction rate of ANFs with different time when mass ratios of KOH to aramid fibers was 3:2.

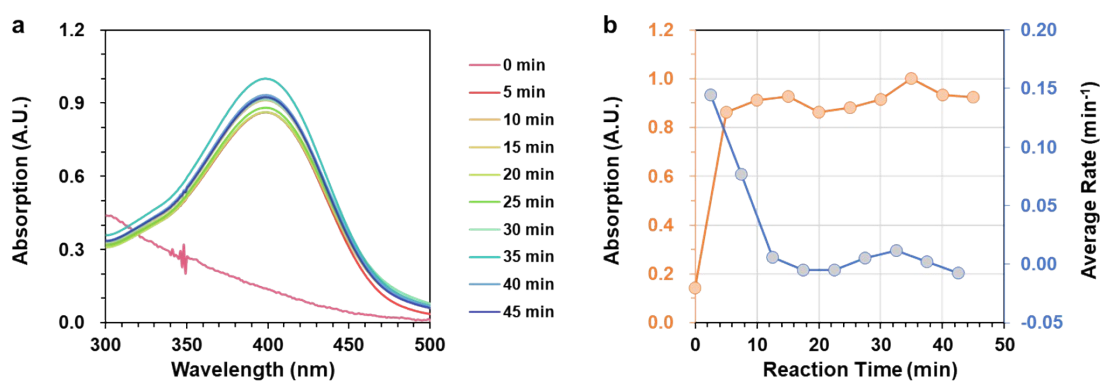

**Figure S6.** UV-Vis absorption and reaction rate of ANFs with different time when mass ratios of KOH to aramid fibers was 4:2.

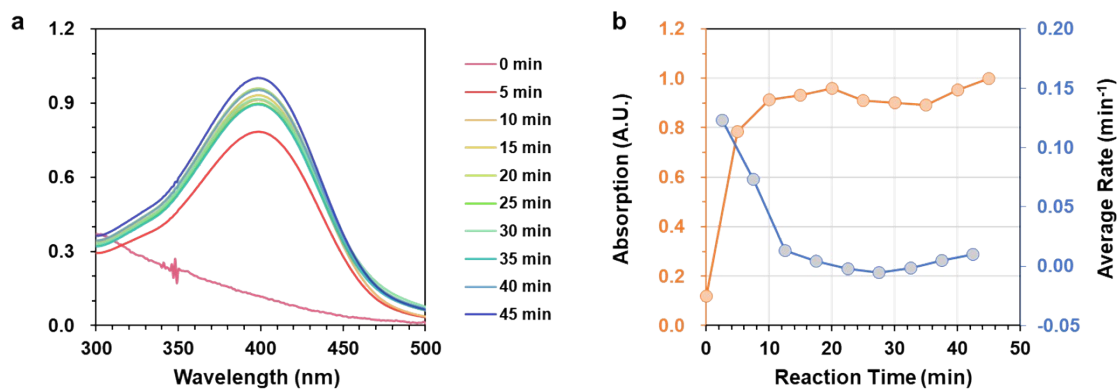

**Figure S7.** UV-Vis absorption and reaction rate of ANFs with different time when mass ratios of KOH to aramid fibers was 5:2.

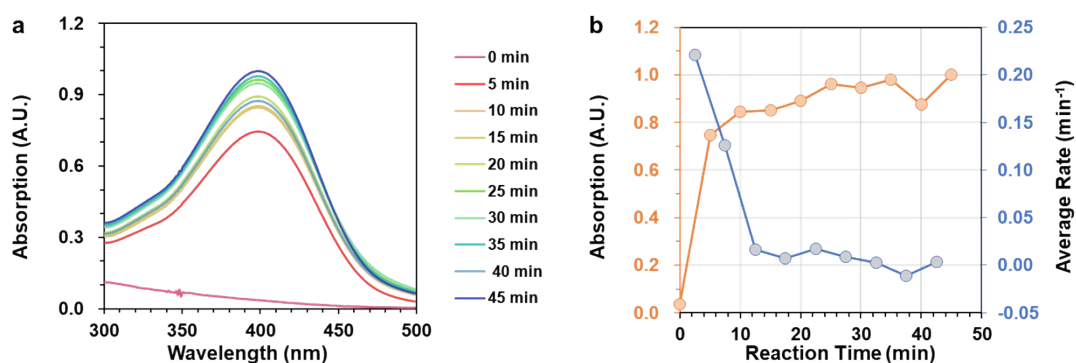

**Figure S8.** UV-Vis absorption and reaction rate of ANFs with different time when volume ratios of H<sub>2</sub>O to DMSO was 1%.

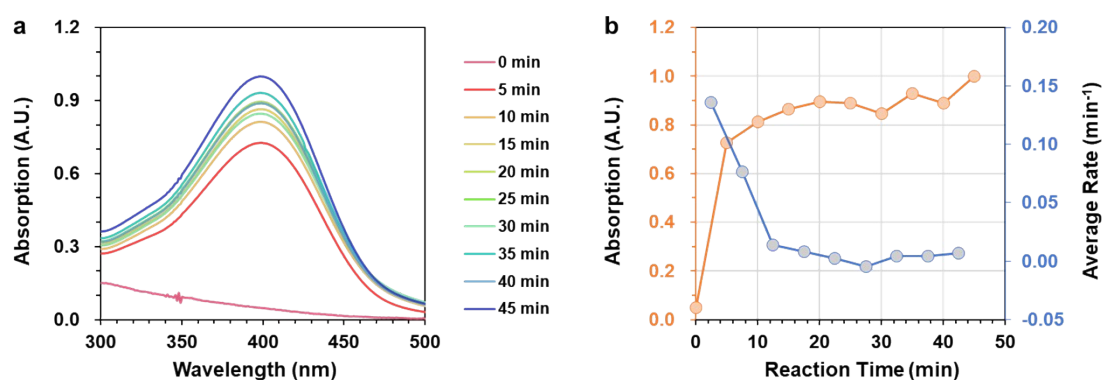

**Figure S9.** UV-Vis absorption and reaction rate of ANFs with different time when volume ratios of H<sub>2</sub>O to DMSO was 2%.



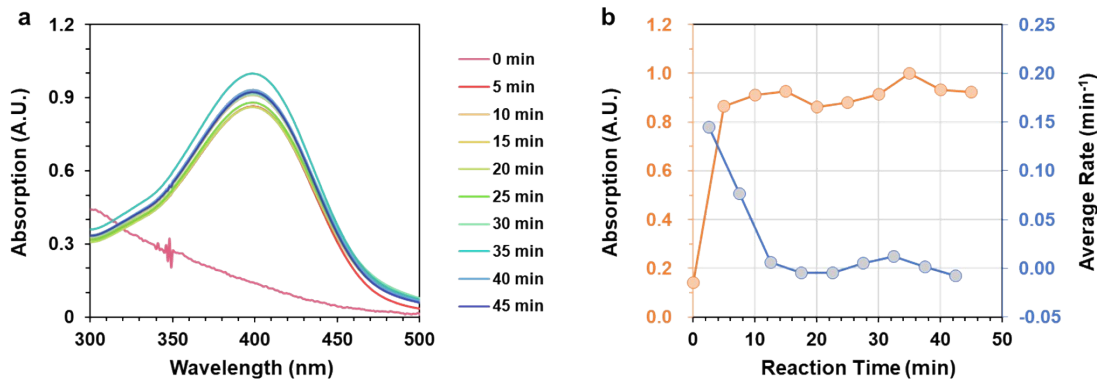

**Figure S10.** UV-Vis absorption and reaction rate of ANFs with different time when volume ratios of H<sub>2</sub>O to DMSO was 3%.

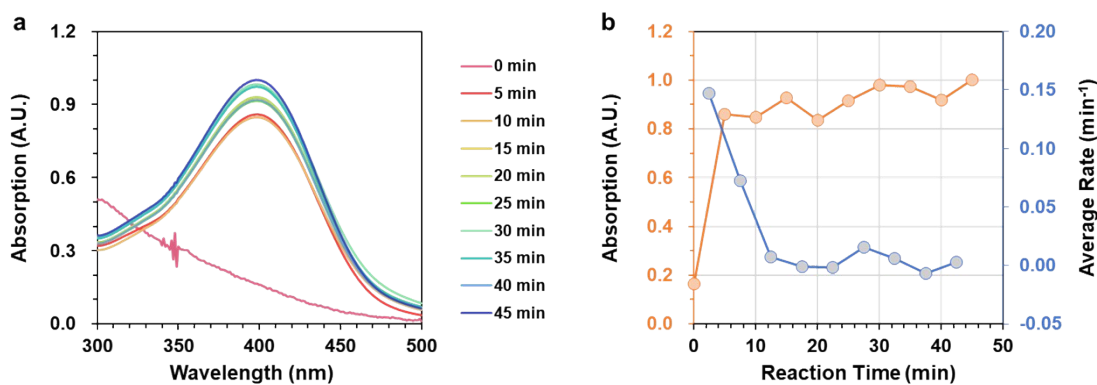

**Figure S11.** UV-Vis absorption and reaction rate of ANFs with different time when volume ratios of H<sub>2</sub>O to DMSO was 4%.

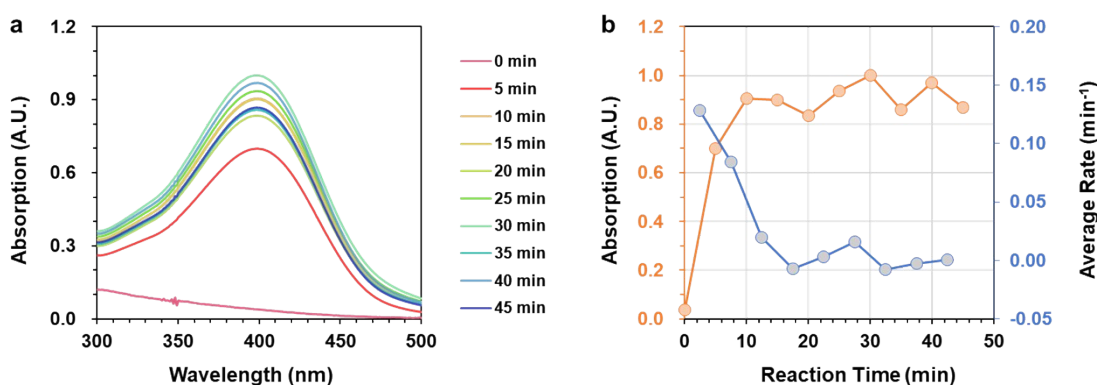

**Figure S12.** UV-Vis absorption and reaction rate of ANFs with different time when volume ratios of H<sub>2</sub>O to DMSO was 5%

$$\delta_{mix} = \varphi_1 \cdot \delta_1 + \varphi_2 \cdot \delta_2 \quad (\text{Equ 1})$$

$$|\delta_{mix} - \delta_{ANFs}| \rightarrow 0 \quad (\text{Equ 2})$$

$\delta_{mix}$  represents the solubility coefficient of the mixing system,  $\delta_1$  and  $\delta_2$  respectively represent the solubility coefficient of the two components in the mixing system,  $\varphi_1$  and  $\varphi_2$  respectively represent the mole fraction of the two components in the mixing system. If  $\delta_{Mix}$  is close to  $\delta_{ANFs}$ , the compatibility between the two components is better and the system is more stable °

## Reference

1. H. C. Yan, J. L. Li, W. T. Tian, L. Y. He, X. L. Tuo and T. Qiu, *RSC Adv.*, 2016, **6**, 26599-26605.
2. J. Yao, J. Jin, E. Lepore, N. M. Pugno, C. W. M. Bastiaansen and T. Peijs, *Macromol. Mater. Eng.*, 2015, **300**, 1238-1245.
3. G. M. Gonzalez, L. A. MacQueen, J. U. Lind, S. A. Fitzgibbons, C. O. Chantre, I. Huggler, H. M. Golecki, J. A. Goss and K. K. Parker, *Macromol. Mater. Eng.*, 2017, **302**.
4. S. Ifuku, H. Maeta, H. Izawa, M. Morimoto and H. Saimoto, *RSC Adv.*, 2014, **4**, 40377-40380.
5. M. Yang, K. Cao, L. Sui, Y. Qi, J. Zhu, A. Waas, E. M. Arruda, J. Kieffer, M. D. Thouless and N. A. Kotov, *ACS Nano*, 2011, **5**, 6945-6954.
6. B. Yang, L. Wang, M. Zhang, J. Luo and X. Ding, *ACS Nano*, 2019, **13**, 7886-7897.
7. J. M. Koo, H. Kim, M. Lee, S. A. Park, H. Jeon, S. H. Shin, S. M. Kim, H. G. Cha, J. Jegal, B. S. Kim, B. G. Choi, S. Y. Hwang, D. X. Oh and J. Park, *Macromolecules*, 2019, **52**, 923-934.
